# Supplementary material
Source: PubMed Central journal article supplement (PMC5516902)
Supplement: NIHMS865404-supplement-Suppl.pdf [file NIHMS865404-supplement-Suppl.pdf]

# Supporting Information

## An <sup>111</sup>In-Labeled PLA-PEG Nanoparticle for Imaging PSMA-Expressing Tissues

*Sangeeta R. Banerjee,<sup>1\*</sup> Catherine A. Foss,<sup>1\*</sup> Allen Horhota,<sup>2</sup> Mrudula Pullambhatla,<sup>1</sup> Kevin McDonnell,<sup>2</sup> Stephen Zale,<sup>2</sup> Martin G. Pomper<sup>1</sup>*

<sup>1</sup> Russell H. Morgan Department of Radiology and Radiological Science, Johns Hopkins Medical Institutions, Baltimore, MD 21287; <sup>2</sup>BIND Therapeutics, Cambridge, MA 02139

|    | Contents                                                                                            | Page number |
|----|-----------------------------------------------------------------------------------------------------|-------------|
| 1. | Synthetic Scheme for <b>DOTA-PEG-Alkyne</b> and <b>In-DOTA-PEGAlkyne</b> and LC-MS characterization | 2           |
| 2. | Stability studies of <b>In-DOTA-PEG-alkyne</b> by LC-MS                                             | 3           |
| 3. | Calculation radiolabeling yield and specific activity of <sup>111</sup> In-labeled nanoparticles    | 4           |
| 4. | HPLC chromatograms for <sup>111</sup> In-DOTA-PEG-alkyne                                            | 5           |
| 5. | Supporting figures for tissue imaging                                                               | 6-9         |
| 6. | Flow cytometry data                                                                                 | 10          |
| 7. | In vivo NIRF imaging of TNP-IRDye and UNP-IRDye                                                     | 10-11       |

1. Reaction scheme to synthesize **DOTA-PEG-Alkyne** and **In-DOTA-PEG-Alkyne**

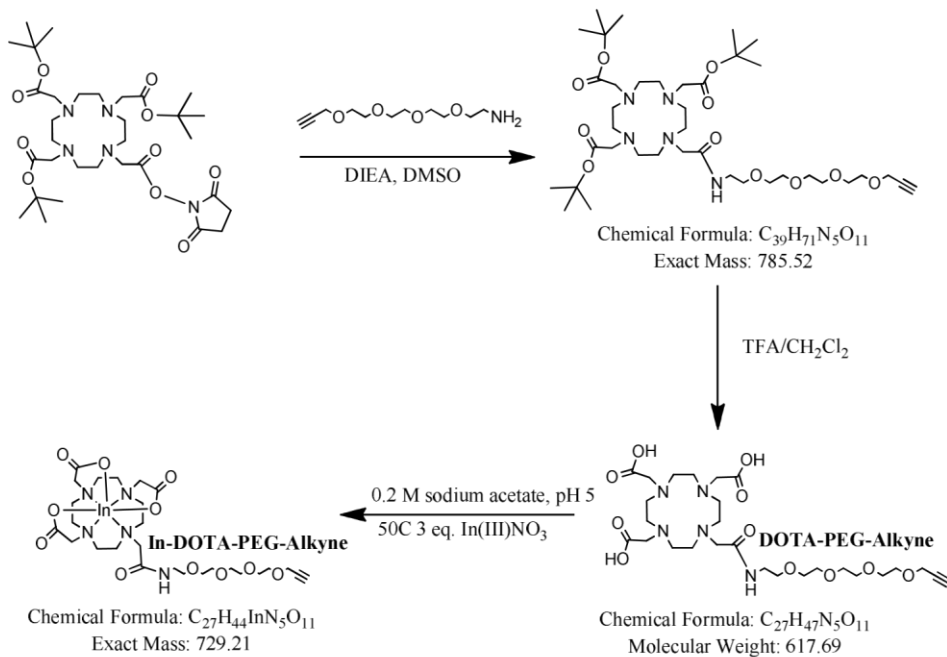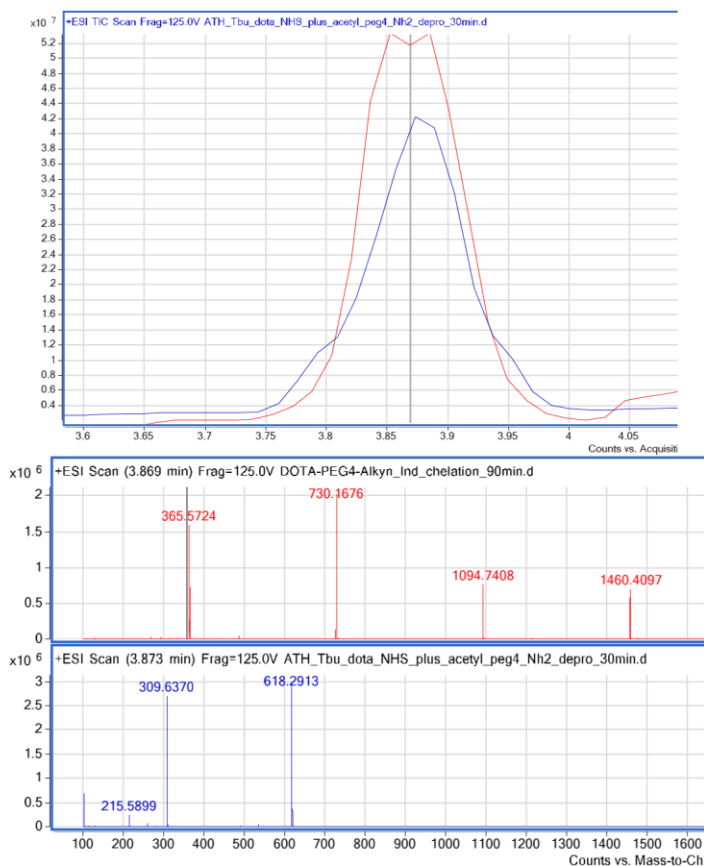

LC-MS spectra for **DOTA-PEG-alkyne** (blue) and **In-DOTA-PEG-alkyne** (red)

2. Stability studies of stable **In-DOTA-PEG-alkyne** (MW: 729.21) by LC-MS) in different experimental condition used for formulation of nanoparticles (click chemistry) formulation

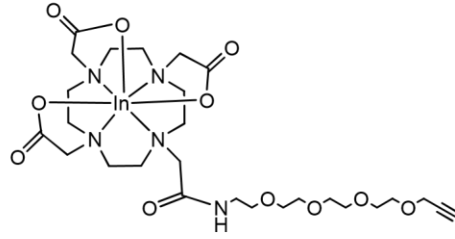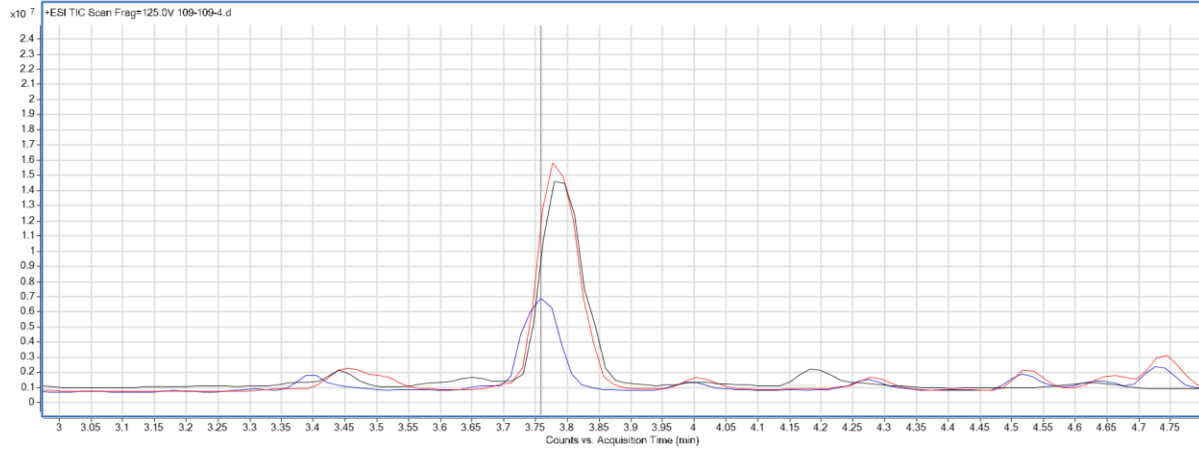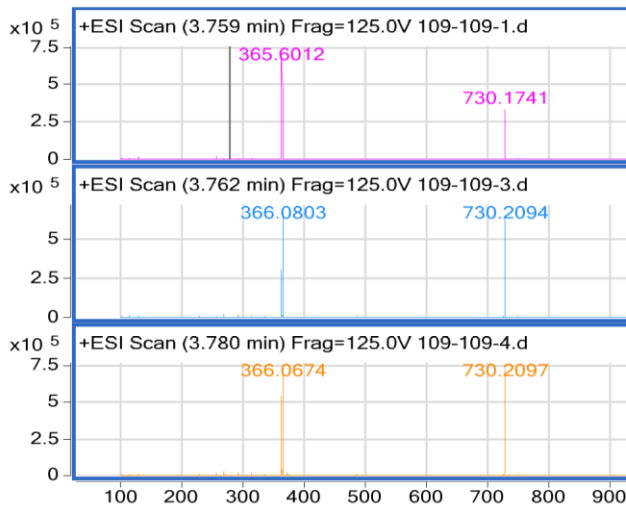

| Color | Cu (1mM) | Ascorbic Acid | 30% N <sub>3</sub> NP's |
|-------|----------|---------------|-------------------------|
| Red   | -        | -             | -                       |
| Black | +        | +             | -                       |
| Blue  | +        | +             | +                       |

### 3. Calculation radiolabeling yield and specific activity of <sup>111</sup>In-labeled nanoparticles

Four separate spin-columns were used to purify the nanoparticles to remove low-molecularweight impurities and free <sup>111</sup>In-DOTA-PEG-alkyne from the nanoparticle formulation before performing the biological experiments. A table was prepared to show the calculation of radiolabeling yield and specific activity.

**Table S1**

| Untargeted Particles (UNP)                           |                                                                                                                                                                                                               | Column 1 (filtration 1) | Column 2 (filtration 2) | Column 3 (filtration 3) | Column 4 (filtration 4) |
|------------------------------------------------------|---------------------------------------------------------------------------------------------------------------------------------------------------------------------------------------------------------------|-------------------------|-------------------------|-------------------------|-------------------------|
| Before purification                                  | 8.55 mCi (18.4*10 <sup>-11</sup> )                                                                                                                                                                            |                         |                         |                         |                         |
| Vial + pipette tips (physical waste)                 |                                                                                                                                                                                                               | 560 μCi                 | 82.6 μCi                | 43.7 μCi                | 114.2 μCi               |
| Activity retained in the column                      |                                                                                                                                                                                                               | 3.29 mCi                | 404 μCi                 | 253 μCi                 | 206 μCi                 |
| Activity retained in Filtrate                        |                                                                                                                                                                                                               | 4.73 mCi                | 4.25 mCi                | 3.96 mCi                | 3.65 mCi (Final)        |
| Radiochemical Yield                                  | (3.65/8.55)*100 = 42.2%                                                                                                                                                                                       |                         |                         |                         |                         |
| No. of mol. Of In-111 (final)                        | 7.85*10 <sup>-11</sup> mole                                                                                                                                                                                   |                         |                         |                         |                         |
| No. of mol. particle taken (lot# 102-192-C) 2.5% GL2 | 80 μl from 83 mg/ml stock (10% N3) =6.64 mg<br>Or (0.0066/21000) =3.16*10 <sup>-7</sup> mole polymer<br><u>4500 polymers/NP</u><br>3.16x10 <sup>-7</sup> / 4500 =<br><u>7.02x10<sup>-11</sup> moles of NP</u> |                         |                         |                         |                         |
| Ratio of In-111/particle                             | 7.85x10 <sup>-11</sup> / 7.02x10 <sup>-11</sup> = 1.1                                                                                                                                                         |                         |                         |                         |                         |
| nanoparticle specific activity                       | <b>20 MBq/mg (0.55 mCi/mg)</b>                                                                                                                                                                                | <b>52 mCi/nmol</b>      | <b>1924 MBq/nmol</b>    |                         |                         |



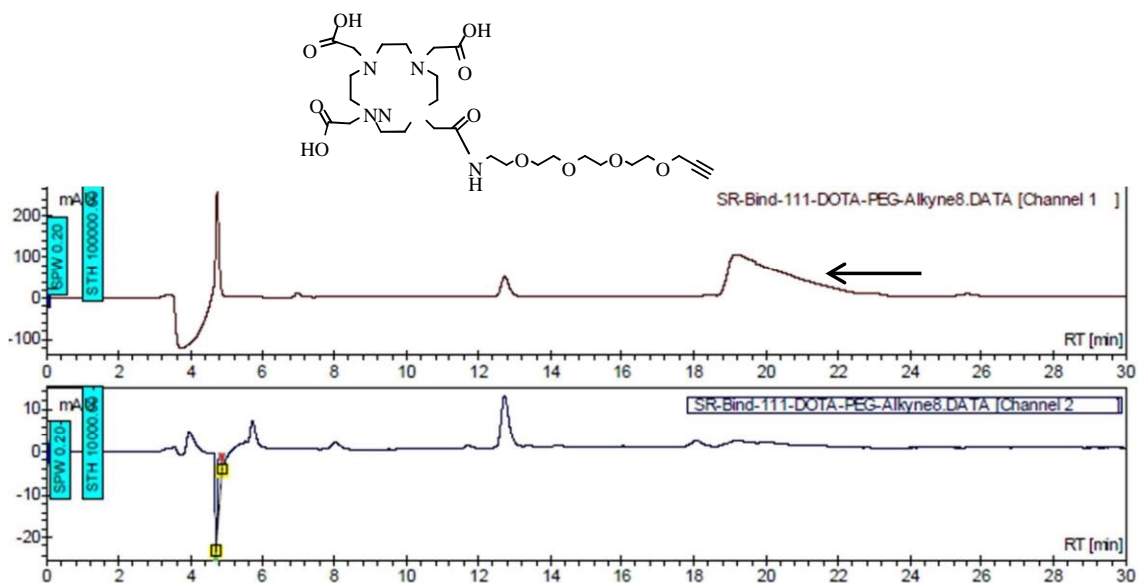

### 7. Supporting Figures for Tissue imaging

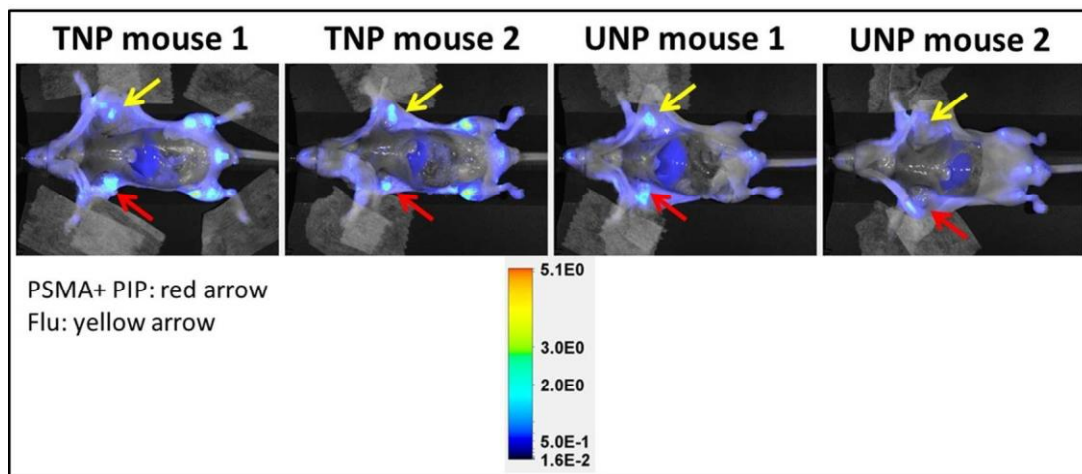

**Figure S1.** *Ex vivo* NIRF imaging of two mouse pairs each receiving either TNP or UNP as indicated. Mice were sacrificed and imaged 72 h after nanoparticle administration. Tumor types are as indicated. Heterogeneity of tumor uptake is apparent by lack of tumor uptake in either line in UNP mouse 2. All images are scaled to the same acquisition parameters.

**Figure S2.**

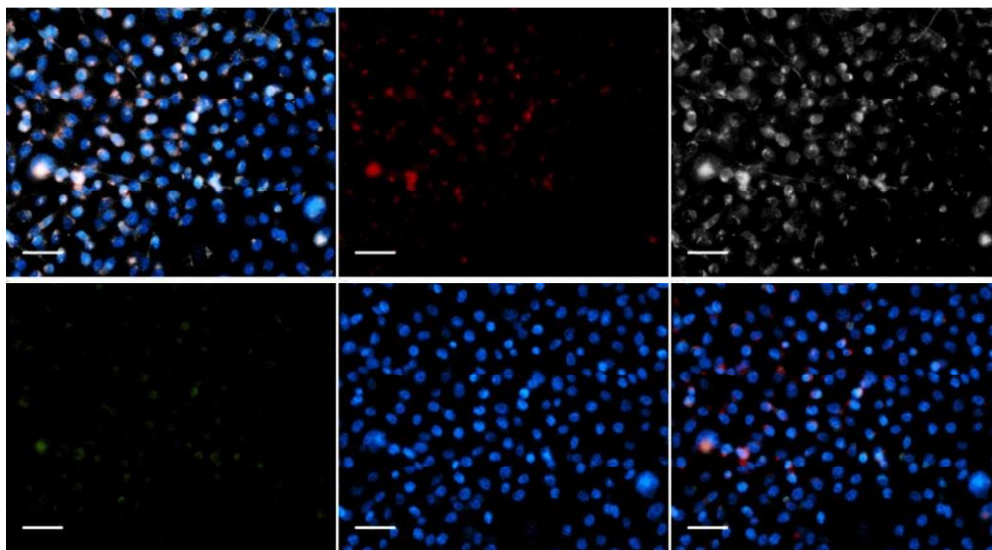

**Figure S2.** *In vitro* epifluorescence micrograph of cultured PSMA negative PC-3 flu cells containing TNPs. This magnification shows the intracellular distribution of TNPs (red) with PSMA (green, absent), tubulin (white) and nuclei (blue). White arrows indicate some co-localization of TNPs with tubulin (white at the centrosome), possibly due to passive endocytosis. Scale bar = 10  $\mu$ m.

**Figure S3.**

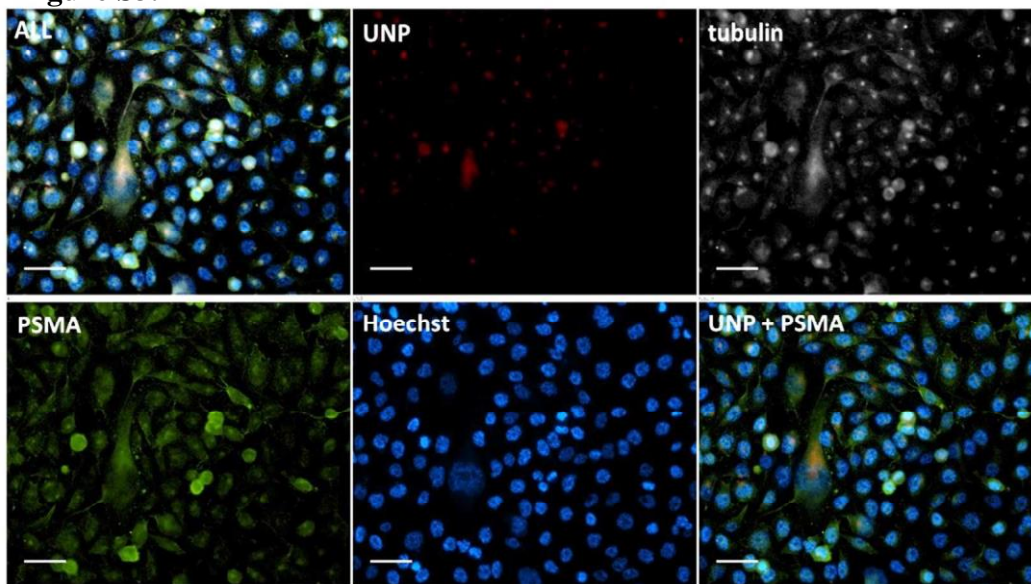

**Figure S3.** *In vitro* epifluorescence micrograph of cultured PSMA+ PC-3 PIP cells containing UNPs. This magnification shows the intracellular distribution of TNPs (red) with PSMA (green), tubulin (white) and nuclei (blue). White arrows indicate some co-localization of TNPs with tubulin (white at the centrosome), possibly due to passive endocytosis. Scale bar = 10  $\mu$ m.



**Figure S4.**

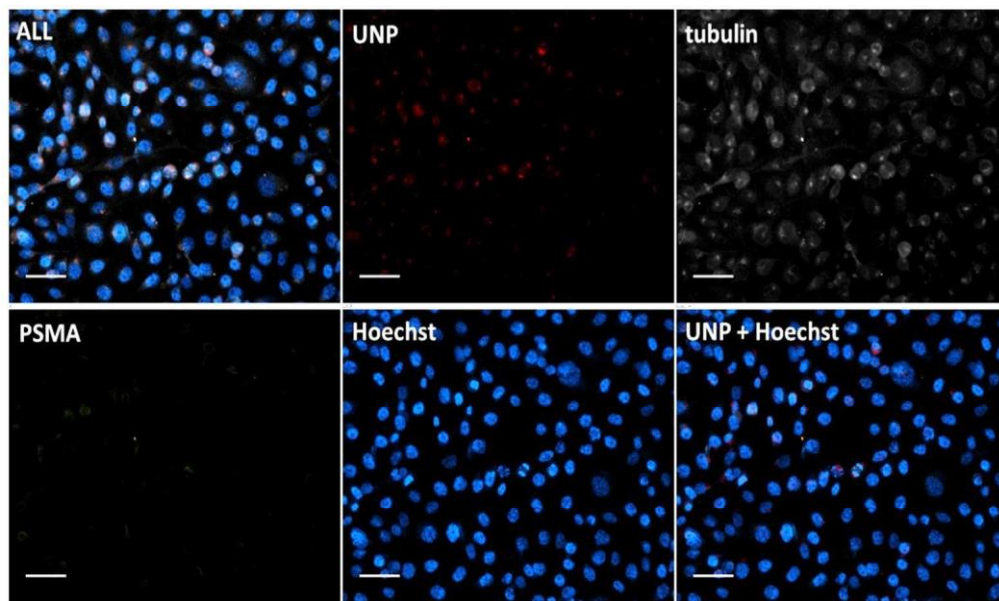

**Figure S4.** *In vitro* epifluorescence micrograph of cultured PSMA negative PC3 flu cells containing UNPs. This magnification shows the intracellular distribution of UNPs (red) with PSMA (green, absent), tubulin (white) and nuclei (blue). White arrows indicate some colocalization of TNPs with tubulin (white at the centrosome), possibly due to passive endocytosis. Scale bar = 10  $\mu$ m.

**Figure S5.**

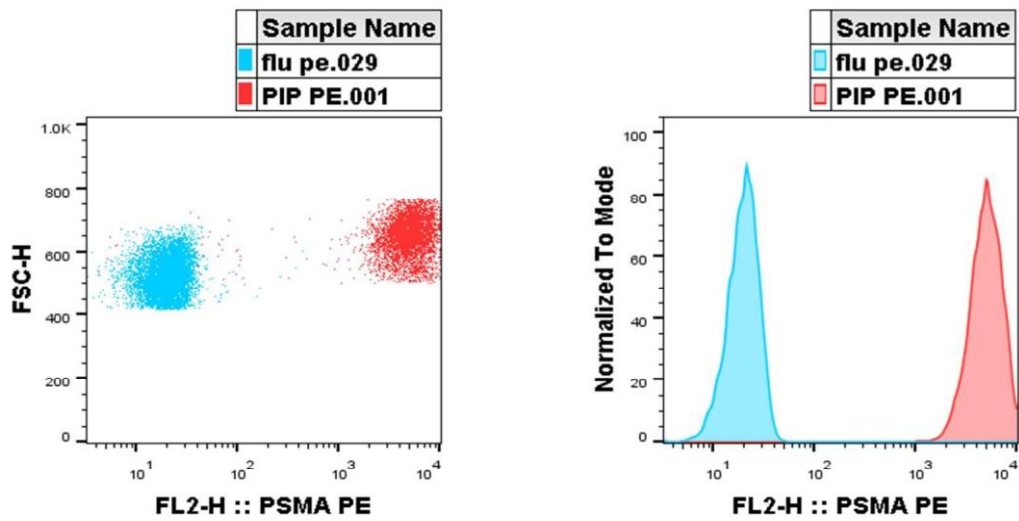

**Figure S5.** Flow cytometry analysis of PSMA surface expression in PSMA(+) PC-3 PIP & PSMA(-) PC-3flu cell lines. The dot plot (left panel) and the histogram (right panel) show that PC-3 PIP has a uniformly high level of PSMA expression where as PC-3flu is negative.

**Figure S6.**

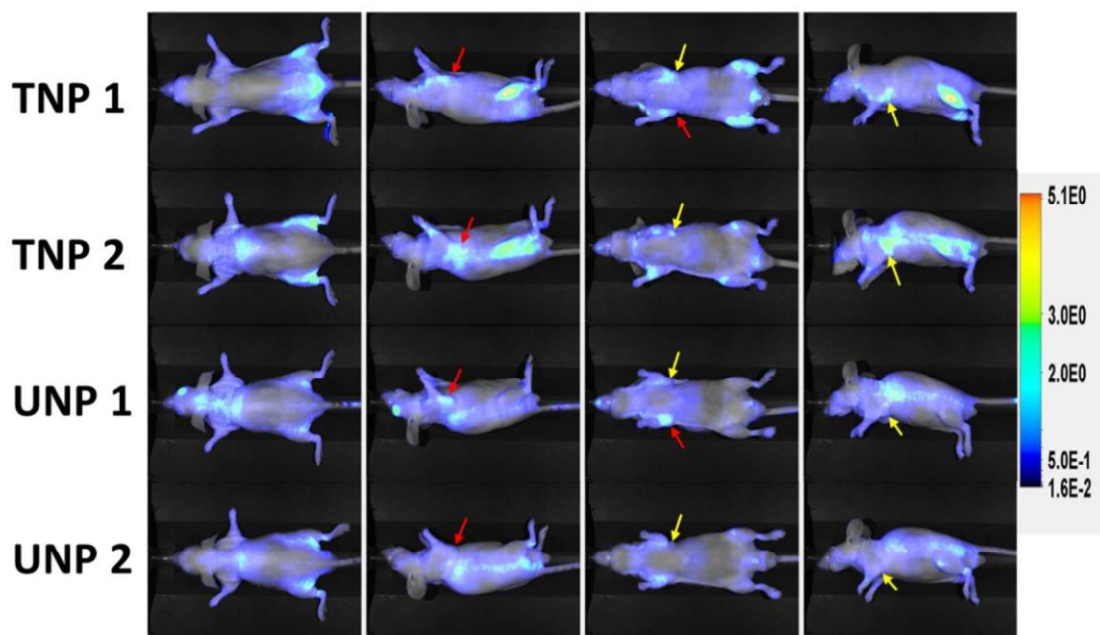

**Supplementary Figure 6.** *In vivo* NIRF imaging of TNP-IRDye and UNP-IRDye distribution in tumor bearing mice at 72 h post-injection. Four athymic nude mice bearing PC-3 PIP (red arrows) and PC-3 flu (yellow arrows) xenografts were injected as indicated with either fluorescent TNP or UNP. Images at 72 h show TNP accumulation around both PIP and flu xenografts as well as around knee joints. UNP accumulation had largely cleared from both tumors except from a  $\sim 4$  mm diameter PIP tumor within the UNP 1 mouse. Color bar indicates relative fluorescence units. PC-3 PIP tumor (red arrow), PC-3 flu tumor (yellow arrow)
